# Supplementary material
Source: publisher figshare collection journal article supplement (https://acs.figshare.com/ndownloader/files/5198107)
Supplement: Supplementary file 1 [file 5198107]

data_sab4119_for_Suzanne_Blum_@
#------------------------------------------------------------------------------
_audit_creation_date                  'Fri Nov  1 13:47:20 2002'
_audit_creation_method                'by teXsan'
_audit_update_record                   ?
#------------------------------------------------------------------------------
# PROCESSING SUMMARY (IUCr Office Use Only) 
_journal_date_recd_electronic          ?
_journal_date_from_coeditor            ?
_journal_date_accepted                 ?
_journal_coeditor_code                 ?
#------------------------------------------------------------------------------
# SUBMISSION DETAILS 
_publ_contact_author_name             ' ENTER NAME'
_publ_contact_author_address
;
    ENTER ADDRESS
;
_publ_contact_author_email            ' ENTER EMAIL ADDRESS '
_publ_contact_author_fax              ' ENTER FAX NUMBER '
_publ_contact_author_phone            ' ENTER PHONE NUMBER '
_publ_contact_letter
;
    ENTER TEXT OF LETTER
;
_publ_requested_journal               ' ENTER JOURNAL NAME HERE'
_publ_requested_category              ' CHOOSE FI FM FO CI CM CO or AD'

_publ_requested_coeditor_name          ?
#------------------------------------------------------------------------------
# TITLE AND AUTHOR LIST 

_publ_section_title
;
    ENTER SECTION TITLE
;

_publ_section_title_footnote
;
    ENTER FOOTNOTE TO TITLE OF PAPER
;
loop_
_publ_author_name
_publ_author_footnote
_publ_author_address
' FIRST AUTHORS NAME '
;
  FIRST AUTHORS FOOTNOTES
;
;
  FIRST AUTHORS ADDRESS
;
_publ_section_synopsis
;
  ENTER SYNOPSIS
;
#------------------------------------------------------------------------------
# TEXT 

_publ_section_abstract
;
    ENTER ABSTRACT
;

_publ_section_comment
;
The zirconacene complex crystallizes as colorless blade-like crystals from a toluene / pentane solution.  There are four molecules of the complex in the unit cell of the primitive, monoclinic space group P2$_1$/c.

The zirconium is coordinated by two cyclopentadienyl ligands, the nitrogen of a t-butyl imine and the oxygen of the camphenyl moiety (see Figures).  There is a pseudo-mirror plane lying in the plane of the zirconium, nitrogen and oxygen atoms.  The angles formed by this plane to the Cp rings are 26.5$^\circ$ and 24.9$^\circ$ (see Tables of Planes).  The orientations of the t-butyl and camphenyl ligands also break the mirror symmetry.

No unusual bond lengths or angles are apparent within the molecule.

  
;

_publ_section_acknowledgements
;
    ENTER ACKNOWLEDGEMENTS
;

_publ_section_references
;
    ENTER OTHER REFERENCES
SMART v5.052d: Area-Detector Software Package, 
Bruker Analytical X-ray Systems, Inc.: Madison, WI, (1995-99)

SAINT: SAX Area-Dectector Integration Program, V5.04; 
Siemens Industrial Automation, Inc.: Madison, WI, (1995)

teXsan: Crystal Structure Analysis Package, Molecular Structure Corporation,
(1985 & 1992). 

;

_publ_section_figure_captions
;
    ENTER FIGURE CAPTIONS
;

_publ_section_exptl_prep
;
    ENTER COMPOUND PREPARATION DETAILS
;

_publ_section_exptl_refinement
;
    ENTER SPECIAL DETAILS OF THE REFINEMENT
;
#------------------------------------------------------------------------------
# CHEMICAL DATA 
_chemical_formula_sum                  'C21 H29 N O Zr '
_chemical_formula_moiety               'C21 H29 N O Zr '
_chemical_formula_weight               402.69
_chemical_melting_point                ?
#------------------------------------------------------------------------------
# CRYSTAL DATA 
_symmetry_cell_setting                 monoclinic
_symmetry_space_group_name_H-M        'P 21/c     '
_symmetry_Int_Tables_number            14
loop_
_symmetry_equiv_pos_as_xyz
x,y,z
-x,1/2+y,1/2-z
-x,-y,-z
x,1/2-y,1/2+z
_cell_length_a                         7.9810(7)
_cell_length_b                         17.469(2)
_cell_length_c                         14.626(1)
_cell_angle_alpha                      90
_cell_angle_beta                       104.344(1)
_cell_angle_gamma                      90
_cell_volume                           1975.6(3)
_cell_formula_units_Z                  4
_cell_measurement_reflns_used          2788
_cell_measurement_theta_min            2.3
_cell_measurement_theta_max            24.6
_cell_measurement_temperature          123.2
#------------------------------------------------------------------------------
_exptl_crystal_description            'blade'
_exptl_crystal_colour                 'colorless'
_exptl_crystal_size_max                0.230
_exptl_crystal_size_mid                0.140
_exptl_crystal_size_min                0.080
_exptl_crystal_size_rad                ?
_exptl_crystal_density_diffrn          1.354
_exptl_crystal_density_meas            ?
_exptl_crystal_density_method         'not measured'
_exptl_absorpt_coefficient_mu          0.563
_exptl_absorpt_correction_type         empirical
_exptl_absorpt_process_details        'Blessing, 1995'
_exptl_absorpt_correction_T_min        0.550
_exptl_absorpt_correction_T_max        0.980
#------------------------------------------------------------------------------
# EXPERIMENTAL DATA 
_diffrn_radiation_type                'Mo K\a'
_diffrn_radiation_wavelength           0.7107
_diffrn_measurement_device_type       'SMART CCD'
_diffrn_measurement_method             \w-scan
_diffrn_reflns_number                  3433
_diffrn_reflns_av_R_equivalents        0.046
_diffrn_reflns_theta_max               24.71
_diffrn_measured_fraction_theta_max    0.9801
_diffrn_reflns_theta_full              24.71
_diffrn_measured_fraction_theta_full   0.9801
_diffrn_reflns_limit_h_min             0
_diffrn_reflns_limit_h_max             9
_diffrn_reflns_limit_k_min             0
_diffrn_reflns_limit_k_max             20
_diffrn_reflns_limit_l_min             -17
_diffrn_reflns_limit_l_max             16
_diffrn_standards_number               ?
_diffrn_standards_interval_count       ?
_diffrn_standards_decay_%              ?
#------------------------------------------------------------------------------
# REFINEMENT DATA 
_refine_special_details
;
Refinement using reflections with F^2^ > 3.0 sigma(F^2^). The weighted R-factor
(wR), goodness of fit (S) and R-factor (gt) are based on F, with F set to zero 
for negative F. The threshold expression of F^2^ > 3.0 sigma(F^2^) is used only 
for calculating R-factor (gt).
;
_reflns_number_total                   3305
_reflns_number_gt                      2360
_reflns_threshold_expression           F^2^>3.0\s(F^2^)
_refine_ls_structure_factor_coef       F
_refine_ls_R_factor_gt                 0.0400
_refine_ls_wR_factor_ref               0.0468
_refine_ls_hydrogen_treatment          noref
_refine_ls_number_reflns               2360
_refine_ls_number_parameters           217
_refine_ls_goodness_of_fit_ref         1.398
_refine_ls_weighting_scheme            calc
_refine_ls_weighting_details
   'w = 1/[\s^2^(Fo) + 0.00022|Fo|^2^]'
_refine_ls_shift/su_max                0.0002
_refine_diff_density_max               0.51
_refine_diff_density_min               -0.72
_refine_ls_extinction_method           none
_refine_ls_extinction_coef             ?
_refine_ls_abs_structure_details       ?
_refine_ls_abs_structure_Flack         ?
#------------------------------------------------------------------------------
# COMPUTATION AND REFINEMENT PROGRAMS 
_computing_data_collection            'Bruker SMART v5.0'
_computing_cell_refinement            'Bruker SAINT v5.04'
_computing_data_reduction             'Bruker SAINT v5.04'
_computing_structure_solution          ?
_computing_structure_refinement       'teXsan'
_computing_publication_material       'teXsan'
_computing_molecular_graphics          ?
#------------------------------------------------------------------------------
loop_
_atom_type_symbol
_atom_type_description
_atom_type_scat_dispersion_real
_atom_type_scat_dispersion_imag
_atom_type_scat_source
  'Zr' 'Zr'  -2.967 0.560 
;International Tables for Crystallography
(1992, Vol. C, Tables 4.2.6.8 and 6.1.1.1)
;
  'O' 'O'  0.011 0.006 
;International Tables for Crystallography
(1992, Vol. C, Tables 4.2.6.8 and 6.1.1.1)
;
  'N' 'N'  0.006 0.003 
;International Tables for Crystallography
(1992, Vol. C, Tables 4.2.6.8 and 6.1.1.1)
;
  'C' 'C'  0.003 0.002 
;International Tables for Crystallography
(1992, Vol. C, Tables 4.2.6.8 and 6.1.1.1)
;
  'H' 'H'  0.000 0.000 
;International Tables for Crystallography
(1992, Vol. C, Table 6.1.1.2)
;
#------------------------------------------------------------------------------
# ATOMIC COORDINATES AND DISPLACEMENT PARAMETERS 
loop_
_atom_site_label
_atom_site_type_symbol
_atom_site_fract_x
_atom_site_fract_y
_atom_site_fract_z
_atom_site_U_iso_or_equiv
_atom_site_adp_type
_atom_site_occupancy
_atom_site_calc_flag
_atom_site_refinement_flags
_atom_site_disorder_assembly
_atom_site_disorder_group
 Zr1    Zr 0.47885(5)  0.18304(2)  0.30608(3)  0.0190(1)   Uani 1.00 d . . .
 O1     O  0.3401(3)   0.2970(2)   0.2788(2)   0.0223(8)   Uani 1.00 d . . .
 N1     N  0.3615(4)   0.1360(2)   0.1967(2)   0.0204(10)  Uani 1.00 d . . .
 C1     C  0.2599(6)   0.1234(3)   0.3874(3)   0.033(1)    Uani 1.00 d . . .
 C2     C  0.3041(7)   0.1930(3)   0.4332(4)   0.042(2)    Uani 1.00 d . . .
 C3     C  0.4765(8)   0.1883(3)   0.4853(3)   0.045(2)    Uani 1.00 d . . .
 C4     C  0.5395(6)   0.1158(3)   0.4698(3)   0.039(2)    Uani 1.00 d . . .
 C5     C  0.4050(6)   0.0762(2)   0.4093(3)   0.030(1)    Uani 1.00 d . . .
 C6     C  0.6961(6)   0.2646(4)   0.2448(4)   0.048(2)    Uani 1.00 d . . .
 C7     C  0.7402(6)   0.2826(3)   0.3404(4)   0.037(2)    Uani 1.00 d . . .
 C8     C  0.8086(6)   0.2182(3)   0.3900(4)   0.043(2)    Uani 1.00 d . . .
 C9     C  0.8019(6)   0.1595(3)   0.3241(6)   0.058(2)    Uani 1.00 d . . .
 C10    C  0.7397(7)   0.1889(4)   0.2347(5)   0.063(2)    Uani 1.00 d . . .
 C11    C  0.2668(6)   0.0902(3)   0.1177(3)   0.030(1)    Uani 1.00 d . . .
 C12    C  0.2393(9)   0.0106(3)   0.1513(4)   0.067(2)    Uani 1.00 d . . .
 C13    C  0.0971(7)   0.1294(3)   0.0708(4)   0.060(2)    Uani 1.00 d . . .
 C14    C  0.3743(8)   0.0831(3)   0.0446(4)   0.059(2)    Uani 1.00 d . . .
 C15    C  0.1534(5)   0.3073(2)   0.2374(3)   0.023(1)    Uani 1.00 d . . .
 C16    C  0.0838(6)   0.3834(3)   0.2588(3)   0.030(1)    Uani 1.00 d . . .
 C17    C  -0.0353(6)  0.4068(3)   0.1620(3)   0.040(2)    Uani 1.00 d . . .
 C18    C  0.0947(7)   0.4267(3)   0.1025(3)   0.036(1)    Uani 1.00 d . . .
 C19    C  0.2717(6)   0.4111(3)   0.1718(3)   0.032(1)    Uani 1.00 d . . .
 C20    C  0.2757(5)   0.3253(2)   0.1811(3)   0.024(1)    Uani 1.00 d . . .
 C21    C  0.2375(7)   0.4363(3)   0.2655(3)   0.039(2)    Uani 1.00 d . . .
 C100   C  0.3970      0.1393      0.4370      0.0025      Uiso 0.00 d P . .
 C101   C  0.7573      0.2288      0.3068      0.0025      Uiso 0.00 d P . .
 H1     H  0.1500      0.1103      0.3481      0.0400      Uiso 1.00 calc . . .
 H2     H  0.2304      0.2362      0.4297      0.0507      Uiso 1.00 calc . . .
 H3     H  0.5396      0.2273      0.5243      0.0543      Uiso 1.00 calc . . .
 H4     H  0.6531      0.0971      0.4957      0.0469      Uiso 1.00 calc . . .
 H5     H  0.4113      0.0255      0.3869      0.0355      Uiso 1.00 calc . . .
 H6     H  0.6447      0.2985      0.1949      0.0574      Uiso 1.00 calc . . .
 H7     H  0.7258      0.3311      0.3669      0.0442      Uiso 1.00 calc . . .
 H8     H  0.8521      0.2143      0.4565      0.0512      Uiso 1.00 calc . . .
 H9     H  0.8347      0.1078      0.3386      0.0693      Uiso 1.00 calc . . .
 H10    H  0.7289      0.1623      0.1770      0.0754      Uiso 1.00 calc . . .
 H11    H  0.1747      0.0135      0.1977      0.0801      Uiso 1.00 calc . . .
 H12    H  0.1776      -0.0191     0.0994      0.0801      Uiso 1.00 calc . . .
 H13    H  0.3481      -0.0125     0.1778      0.0801      Uiso 1.00 calc . . .
 H14    H  0.1203      0.1781      0.0476      0.0722      Uiso 1.00 calc . . .
 H15    H  0.0350      0.0988      0.0199      0.0722      Uiso 1.00 calc . . .
 H16    H  0.0300      0.1359      0.1156      0.0722      Uiso 1.00 calc . . .
 H17    H  0.4824      0.0600      0.0730      0.0713      Uiso 1.00 calc . . .
 H18    H  0.3138      0.0524      -0.0067     0.0713      Uiso 1.00 calc . . .
 H19    H  0.3932      0.1326      0.0220      0.0713      Uiso 1.00 calc . . .
 H20    H  0.0791      0.2642      0.2224      0.0274      Uiso 1.00 calc . . .
 H21    H  0.0326      0.3845      0.3109      0.0355      Uiso 1.00 calc . . .
 H22    H  -0.1083     0.3655      0.1346      0.0476      Uiso 1.00 calc . . .
 H23    H  -0.1042     0.4499      0.1682      0.0476      Uiso 1.00 calc . . .
 H24    H  0.0779      0.3948      0.0484      0.0435      Uiso 1.00 calc . . .
 H25    H  0.0845      0.4789      0.0834      0.0435      Uiso 1.00 calc . . .
 H26    H  0.3691      0.4337      0.1561      0.0389      Uiso 1.00 calc . . .
 H27    H  0.2824      0.2939      0.1291      0.0283      Uiso 1.00 calc . . .
 H28    H  0.2080      0.4889      0.2663      0.0474      Uiso 1.00 calc . . .
 H29    H  0.3311      0.4253      0.3181      0.0474      Uiso 1.00 calc . . .

loop_
_atom_site_aniso_label
_atom_site_aniso_U_11
_atom_site_aniso_U_22
_atom_site_aniso_U_33
_atom_site_aniso_U_12
_atom_site_aniso_U_13
_atom_site_aniso_U_23
 Zr1    0.0152(2)   0.0194(2)   0.0213(2)   0.0019(2)   0.0023(2)   -0.0007(2) 
 O1     0.021(1)    0.023(2)    0.023(2)    0.002(1)    0.006(1)    0.001(1)   
 N1     0.023(2)    0.017(2)    0.022(2)    -0.003(2)   0.007(2)    -0.001(2)  
 C1     0.028(3)    0.047(3)    0.026(3)    0.002(2)    0.010(2)    0.012(2)   
 C2     0.065(4)    0.037(3)    0.036(3)    0.021(3)    0.032(3)    0.015(2)   
 C3     0.079(4)    0.039(3)    0.017(3)    -0.012(3)   0.010(3)    -0.002(2)  
 C4     0.033(3)    0.040(3)    0.038(3)    -0.001(2)   -0.005(2)   0.020(2)   
 C5     0.030(3)    0.025(3)    0.035(3)    0.000(2)    0.010(2)    0.007(2)   
 C6     0.015(2)    0.079(5)    0.050(4)    -0.008(3)   0.009(2)    0.019(3)   
 C7     0.024(3)    0.026(3)    0.060(4)    -0.007(2)   0.008(2)    -0.002(3)  
 C8     0.019(2)    0.048(3)    0.051(3)    -0.011(2)   -0.011(2)   0.010(3)   
 C9     0.014(3)    0.029(3)    0.128(6)    0.000(2)    0.014(3)    -0.013(4)  
 C10    0.028(3)    0.096(6)    0.075(5)    -0.023(4)   0.033(3)    -0.048(4)  
 C11    0.037(3)    0.027(3)    0.022(3)    -0.003(2)   0.003(2)    -0.004(2)  
 C12    0.104(5)    0.037(3)    0.045(4)    -0.036(4)   -0.008(3)   -0.001(3)  
 C13    0.045(3)    0.060(4)    0.057(4)    0.001(3)    -0.022(3)   -0.021(3)  
 C14    0.076(4)    0.059(4)    0.043(4)    -0.003(3)   0.015(3)    -0.016(3)  
 C15    0.017(2)    0.026(3)    0.023(2)    0.001(2)    0.001(2)    0.002(2)   
 C16    0.037(3)    0.030(3)    0.025(3)    0.016(2)    0.013(2)    0.004(2)   
 C17    0.038(3)    0.042(3)    0.035(3)    0.023(3)    0.002(2)    0.006(2)   
 C18    0.055(3)    0.029(3)    0.021(3)    0.010(2)    0.002(2)    0.005(2)   
 C19    0.033(3)    0.029(3)    0.034(3)    -0.009(2)   0.006(2)    0.006(2)   
 C20    0.030(2)    0.026(3)    0.015(2)    0.002(2)    0.005(2)    0.001(2)   
 C21    0.063(4)    0.020(3)    0.030(3)    0.006(3)    0.000(3)    0.001(2)   
#------------------------------------------------------------------------------
_geom_special_details
;
 ?
;
loop_
_geom_bond_atom_site_label_1
_geom_bond_atom_site_label_2
_geom_bond_distance
_geom_bond_site_symmetry_1
_geom_bond_site_symmetry_2
_geom_bond_publ_flag
 ZR1       O1        2.265(3)   . . yes
 ZR1       N1        1.836(3)   . . yes
 ZR1       C1        2.566(4)   . . yes
 ZR1       C2        2.592(5)   . . yes
 ZR1       C3        2.627(5)   . . yes
 ZR1       C4        2.603(4)   . . yes
 ZR1       C5        2.560(4)   . . yes
 ZR1       C6        2.571(5)   . . yes
 ZR1       C9        2.559(5)   . . yes
 ZR1       C10       2.552(5)   . . yes
 ZR1       C100      2.3010(4)  . . yes
 ZR1       C101      2.3591(4)  . . yes
 O1        C15       1.473(5)   . . yes
 O1        C20       1.478(4)   . . yes
 N1        C11       1.453(5)   . . yes
 C1        C2        1.391(7)   . . yes
 C1        C5        1.393(6)   . . yes
 C1        C100      1.186(5)   . . yes
 C2        C3        1.400(8)   . . yes
 C2        C100      1.189(5)   . . yes
 C3        C4        1.401(7)   . . yes
 C3        C100      1.187(5)   . . yes
 C4        C5        1.393(6)   . . yes
 C4        C100      1.193(5)   . . yes
 C5        C100      1.182(4)   . . yes
 C6        C7        1.391(7)   . . yes
 C6        C10       1.384(8)   . . yes
 C6        C101      1.111(5)   . . yes
 C7        C8        1.377(7)   . . yes
 C7        C101      1.085(5)   . . yes
 C8        C9        1.399(8)   . . yes
 C8        C101      1.198(5)   . . yes
 C9        C10       1.378(8)   . . yes
 C9        C101      1.269(5)   . . yes
 C10       C101      1.242(6)   . . yes
 C11       C12       1.508(7)   . . yes
 C11       C13       1.521(7)   . . yes
 C11       C14       1.533(7)   . . yes
 C15       C16       1.504(6)   . . yes
 C15       C20       1.458(6)   . . yes
 C16       C17       1.552(6)   . . yes
 C16       C21       1.519(7)   . . yes
 C17       C18       1.550(7)   . . yes
 C18       C19       1.546(6)   . . yes
 C19       C20       1.504(6)   . . yes
 C19       C21       1.526(7)   . . yes
#------------------------------------------------------------------------------
loop_
_geom_angle_atom_site_label_1
_geom_angle_atom_site_label_2
_geom_angle_atom_site_label_3
_geom_angle
_geom_angle_site_symmetry_1
_geom_angle_site_symmetry_2
_geom_angle_site_symmetry_3
_geom_angle_publ_flag
 O1        ZR1       N1        96.8(1)    . . . ?
 O1        ZR1       C100      102.20(7)  . . . ?
 O1        ZR1       C101      97.01(7)   . . . ?
 N1        ZR1       C100      112.8(1)   . . . ?
 N1        ZR1       C101      115.6(1)   . . . ?
 C100      ZR1       C101      124.74(2)  . . . ?
 ZR1       O1        C15       125.5(2)   . . . ?
 ZR1       O1        C20       120.1(2)   . . . ?
 C15       O1        C20       59.2(3)    . . . ?
 ZR1       N1        C11       172.5(3)   . . . ?
 C2        C1        C5        108.0(4)   . . . ?
 C1        C2        C3        107.9(4)   . . . ?
 C2        C3        C4        108.0(4)   . . . ?
 C3        C4        C5        107.5(4)   . . . ?
 C1        C5        C4        108.6(4)   . . . ?
 C7        C6        C10       108.4(5)   . . . ?
 C6        C7        C8        108.3(5)   . . . ?
 C7        C8        C9        107.1(5)   . . . ?
 C8        C9        C10       108.9(5)   . . . ?
 C6        C10       C9        107.3(5)   . . . ?
 N1        C11       C12       109.7(4)   . . . ?
 N1        C11       C13       109.9(4)   . . . ?
 N1        C11       C14       109.2(4)   . . . ?
 C12       C11       C13       112.1(5)   . . . ?
 C12       C11       C14       107.7(4)   . . . ?
 C13       C11       C14       108.1(4)   . . . ?
 O1        C15       C16       114.2(3)   . . . ?
 O1        C15       C20       60.6(2)    . . . ?
 C16       C15       C20       105.1(3)   . . . ?
 C15       C16       C17       102.5(3)   . . . ?
 C15       C16       C21       102.5(3)   . . . ?
 C17       C16       C21       101.6(4)   . . . ?
 C16       C17       C18       103.1(4)   . . . ?
 C17       C18       C19       102.8(4)   . . . ?
 C18       C19       C20       103.3(4)   . . . ?
 C18       C19       C21       101.6(4)   . . . ?
 C20       C19       C21       102.2(4)   . . . ?
 O1        C20       C15       60.2(2)    . . . ?
 O1        C20       C19       114.5(3)   . . . ?
 C15       C20       C19       105.3(4)   . . . ?
 C16       C21       C19       95.1(3)    . . . ?
 ZR1       C100      C1        88.7(2)    . . . ?
 ZR1       C100      C2        90.1(2)    . . . ?
 ZR1       C100      C3        92.1(2)    . . . ?
 ZR1       C100      C4        90.6(2)    . . . ?
 ZR1       C100      C5        88.5(2)    . . . ?
 ZR1       C101      C6        87.9(2)    . . . ?
 ZR1       C101      C7        94.1(2)    . . . ?
 ZR1       C101      C8        92.1(2)    . . . ?
 ZR1       C101      C9        84.0(2)    . . . ?
 ZR1       C101      C10       84.2(2)    . . . ?
#------------------------------------------------------------------------------
loop_
_geom_torsion_atom_site_label_1
_geom_torsion_atom_site_label_2
_geom_torsion_atom_site_label_3
_geom_torsion_atom_site_label_4
_geom_torsion
_geom_torsion_site_symmetry_1
_geom_torsion_site_symmetry_2
_geom_torsion_site_symmetry_3
_geom_torsion_site_symmetry_4
_geom_torsion_publ_flag
 ZR1       O1        C15       C16       158.7(3)   . . . . ?
 ZR1       O1        C15       C20       -107.0(3)  . . . . ?
 ZR1       O1        C20       C15       115.8(3)   . . . . ?
 ZR1       O1        C20       C19       -150.0(3)  . . . . ?
 ZR1       N1        C11       C12       -4(2)      . . . . ?
 ZR1       N1        C11       C13       118(2)     . . . . ?
 ZR1       N1        C11       C14       -122(2)    . . . . ?
 ZR1       C100      C1        C2        -90.5(2)   . . . . ?
 ZR1       C100      C1        C5        88.9(2)    . . . . ?
 ZR1       C100      C2        C1        88.6(2)    . . . . ?
 ZR1       C100      C2        C3        -92.2(3)   . . . . ?
 ZR1       C100      C3        C2        89.4(2)    . . . . ?
 ZR1       C100      C3        C4        -89.9(3)   . . . . ?
 ZR1       C100      C4        C3        92.0(3)    . . . . ?
 ZR1       C100      C4        C5        -88.3(2)   . . . . ?
 ZR1       C100      C5        C1        -89.2(2)   . . . . ?
 ZR1       C100      C5        C4        91.1(3)    . . . . ?
 ZR1       C101      C6        C7        94.6(2)    . . . . ?
 ZR1       C101      C6        C10       -84.5(3)   . . . . ?
 ZR1       C101      C7        C6        -87.0(2)   . . . . ?
 ZR1       C101      C7        C8        91.0(2)    . . . . ?
 ZR1       C101      C8        C7        -93.7(3)   . . . . ?
 ZR1       C101      C8        C9        82.7(3)    . . . . ?
 ZR1       C101      C9        C8        -94.6(3)   . . . . ?
 ZR1       C101      C9        C10       86.2(3)    . . . . ?
 ZR1       C101      C10       C6        89.7(3)    . . . . ?
 ZR1       C101      C10       C9        -85.9(3)   . . . . ?
 O1        ZR1       N1        C11       -134(2)    . . . . ?
 O1        ZR1       C100      C1        76.2(3)    . . . . ?
 O1        ZR1       C100      C2        4.4(3)     . . . . ?
 O1        ZR1       C100      C3        -67.8(3)   . . . . ?
 O1        ZR1       C100      C4        -139.9(3)  . . . . ?
 O1        ZR1       C100      C5        148.2(2)   . . . . ?
 O1        ZR1       C101      C6        -42.4(4)   . . . . ?
 O1        ZR1       C101      C7        35.9(3)    . . . . ?
 O1        ZR1       C101      C8        110.0(3)   . . . . ?
 O1        ZR1       C101      C9        178.7(4)   . . . . ?
 O1        ZR1       C101      C10       -114.4(4)  . . . . ?
 O1        C15       C16       C17       136.6(4)   . . . . ?
 O1        C15       C16       C21       31.5(4)    . . . . ?
 O1        C15       C20       C19       -109.8(3)  . . . . ?
 O1        C20       C15       C16       109.6(3)   . . . . ?
 O1        C20       C19       C18       -136.3(4)  . . . . ?
 O1        C20       C19       C21       -31.1(5)   . . . . ?
 N1        ZR1       O1        C15       40.2(3)    . . . . ?
 N1        ZR1       O1        C20       -31.5(3)   . . . . ?
 N1        ZR1       C1        C2        -147.5(3)  . . . . ?
 C1        C2        C3        C4        1.2(6)     . . . . ?
 C1        C5        C4        C3        0.0(5)     . . . . ?
 C2        C1        C5        C4        0.8(5)     . . . . ?
 C2        C3        C4        C5        -0.8(6)    . . . . ?
 C3        C2        C1        C5        -1.2(5)    . . . . ?
 C6        C7        C8        C9        -1.6(5)    . . . . ?
 C6        C10       C9        C8        -4.1(6)    . . . . ?
 C7        C6        C10       C9        3.2(6)     . . . . ?
 C7        C8        C9        C10       3.5(6)     . . . . ?
 C8        C7        C6        C10       -1.0(5)    . . . . ?
 C11       N1        ZR1       C100      -28(2)     . . . . ?
 C11       N1        ZR1       C101      124(2)     . . . . ?
 C15       O1        ZR1       C100      -75.0(3)   . . . . ?
 C15       O1        ZR1       C101      157.2(3)   . . . . ?
 C15       O1        C20       C19       94.2(4)    . . . . ?
 C15       C16       C17       C18       -71.6(4)   . . . . ?
 C15       C16       C21       C19       50.5(4)    . . . . ?
 C15       C20       C19       C18       -72.5(4)   . . . . ?
 C15       C20       C19       C21       32.7(4)    . . . . ?
 C16       C15       O1        C20       -94.3(4)   . . . . ?
 C16       C15       C20       C19       -0.2(4)    . . . . ?
 C16       C17       C18       C19       0.9(4)     . . . . ?
 C16       C21       C19       C18       56.1(4)    . . . . ?
 C16       C21       C19       C20       -50.5(4)   . . . . ?
 C17       C16       C15       C20       72.5(4)    . . . . ?
 C17       C16       C21       C19       -55.3(4)   . . . . ?
 C17       C18       C19       C20       70.0(4)    . . . . ?
 C17       C18       C19       C21       -35.6(4)   . . . . ?
 C18       C17       C16       C21       34.2(4)    . . . . ?
 C20       O1        ZR1       C100      -146.7(2)  . . . . ?
 C20       O1        ZR1       C101      85.4(2)    . . . . ?
 C20       C15       C16       C21       -32.6(4)   . . . . ?
#------------------------------------------------------------------------------
loop_
_geom_contact_atom_site_label_1
_geom_contact_atom_site_label_2
_geom_contact_distance
_geom_contact_site_symmetry_1
_geom_contact_site_symmetry_2
_geom_contact_publ_flag
 ZR1       C1        2.566(4)   . . ?
 ZR1       C2        2.592(5)   . . ?
 ZR1       C3        2.627(5)   . . ?
 ZR1       C4        2.603(4)   . . ?
 ZR1       C5        2.560(4)   . . ?
 ZR1       C6        2.571(5)   . . ?
 ZR1       C9        2.559(5)   . . ?
 ZR1       C10       2.552(5)   . . ?
 C1        C9        3.597(7)   . 1_455 ?
#------------------------------------------------------------------------------
